# Supplementary material for: Her6 and Prox1a are novel regulators of photoreceptor regeneration in the zebrafish retina
Source: PubMed Central journal article supplement (PMC10653607; doi:10.1371/journal.pgen.1011010), 2023-11-06
Supplement: pgen.1011010.s001.pdf [file pgen.1011010.s001.pdf]

| Gene               | Expression  | OE/ RNAi | <i>GMRH108Gal4</i> ><br>phenotype | Heat shock flip out<br>clones<br>phenotype |
|--------------------|-------------|----------|-----------------------------------|--------------------------------------------|
| <b>asense</b>      | Neuroblasts | OE       | n                                 | n                                          |
|                    |             | RNAi     | n                                 | n                                          |
| <b>chinmo</b>      | Neurons     | RNAi     | n                                 | n                                          |
| <b>deadpan</b>     | Neuroblasts | OE       | y                                 | y                                          |
| <b>dichaete</b>    | Neuroblasts | RNAi     | n                                 | n                                          |
| <b>elav</b>        | Neurons     | RNAi     | n                                 | y                                          |
| <b>erect wing</b>  | Neurons     | RNAi     | n                                 | n                                          |
| <b>grainy head</b> | Neuroblasts | RNAi     | n                                 | n                                          |
| <b>inscuteable</b> | Neuroblasts | N/A      | n/a                               | n/a                                        |
| <b>klumpfuss</b>   | Neuroblasts | N/A      | n/a                               | n/a                                        |
| <b>Lim3</b>        | Neurons     | RNAi     | n                                 | n                                          |
| <b>minibrain</b>   | Neurons     | RNAi     | n                                 | n                                          |
| <b>miranda</b>     | Neuroblasts | N/A      | n/a                               | n/a                                        |
| <b>ocelliless</b>  | Neurons     | RNAi     | n/a                               | n/a                                        |
| <b>prospero</b>    | Neurons     | RNAi     | y                                 | y                                          |
| <b>roundabout3</b> | Neurons     | N/A      | n/a                               | n/a                                        |
| <b>SoxNeuro</b>    | Neurons     | OE       | n                                 | n/a                                        |
|                    |             | RNAi     | n                                 | y                                          |
| <b>worniu</b>      | Neuroblasts | N/A      | n/a                               | n/a                                        |
| <b>zelda</b>       | Neuroblasts | RNAi     | n                                 | n                                          |
