# Supplementary material for: Her6 and Prox1a are novel regulators of photoreceptor regeneration in the zebrafish retina
Source: PubMed Central journal article supplement (PMC10653607; doi:10.1371/journal.pgen.1011010), 2023-11-06

A

Hours post ablation (hpa)

0 16 24 48 72 96

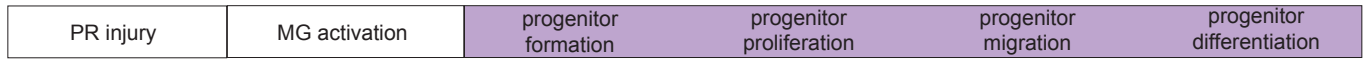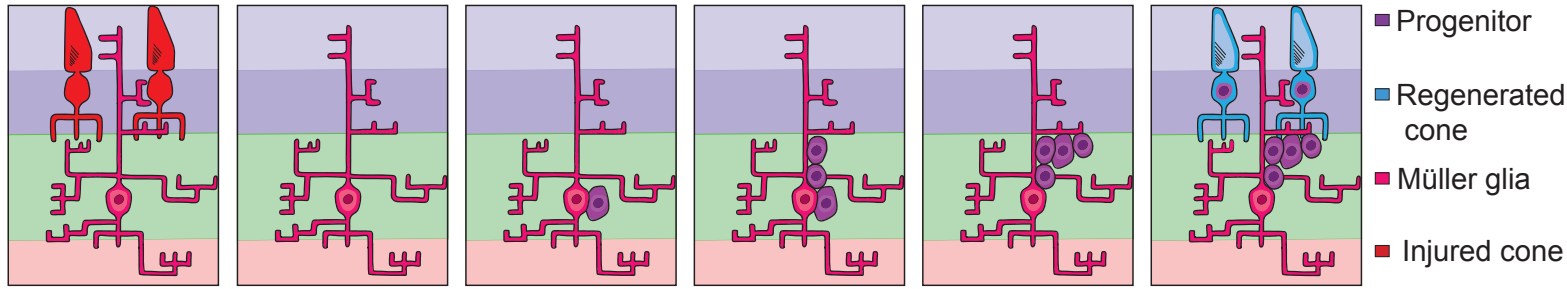

control

16hpa

24hpa

48hpa

72hpa

96hpa

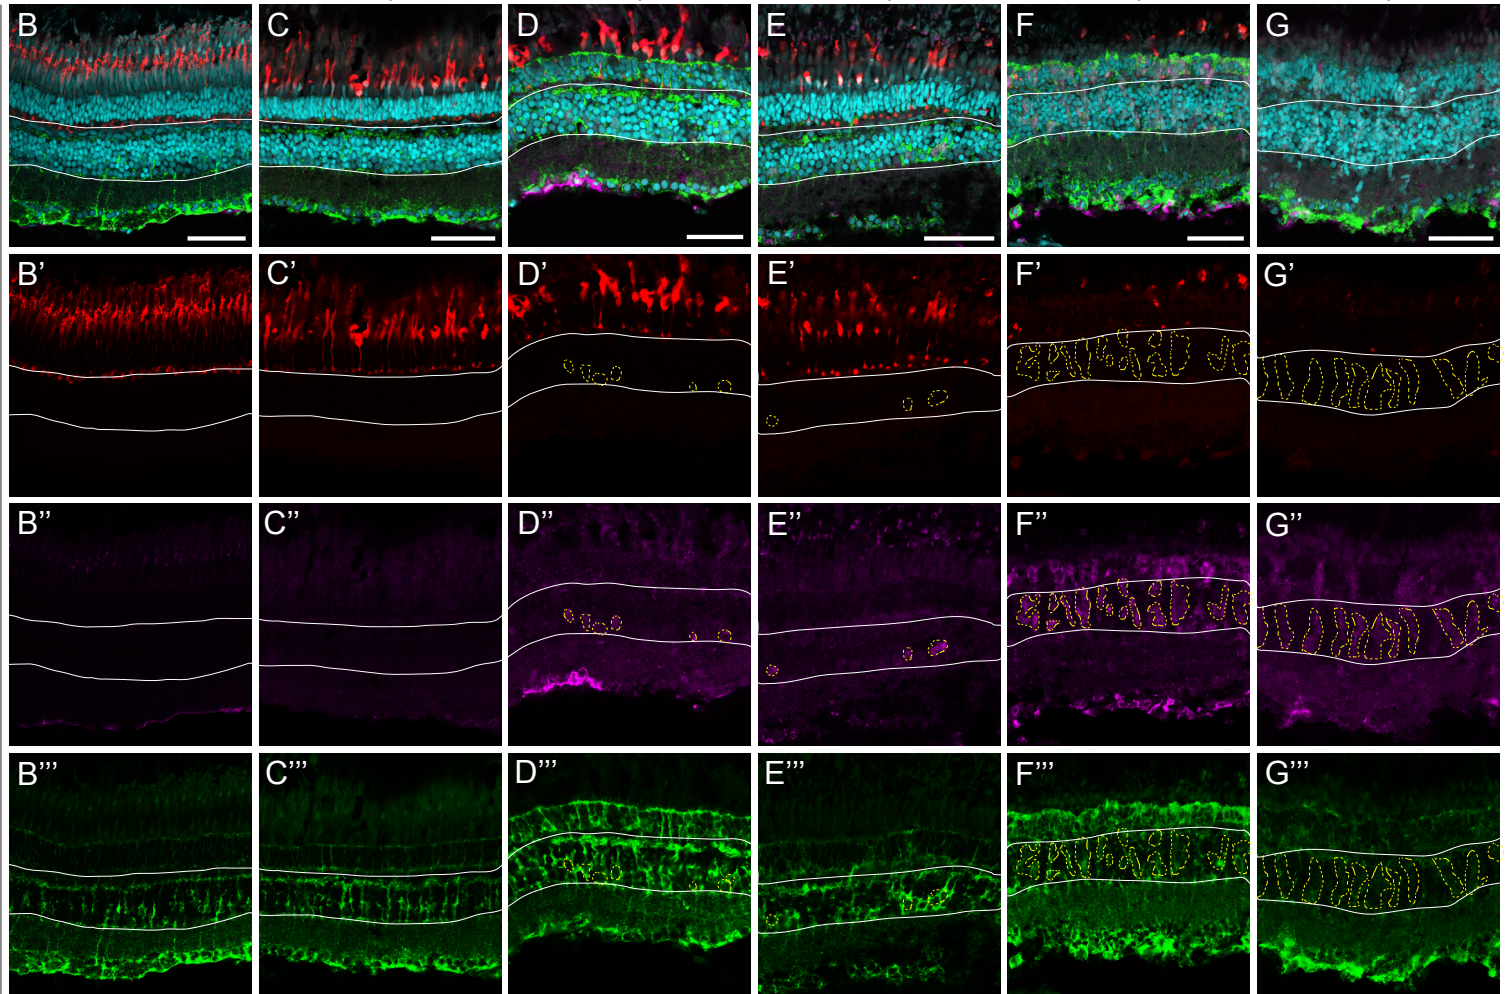

Supplement: pgen.1011010.s003.pdf [file pgen.1011010.s003.pdf]
