# Supplementary material for: Her6 and Prox1a are novel regulators of photoreceptor regeneration in the zebrafish retina
Source: PubMed Central journal article supplement (PMC10653607; doi:10.1371/journal.pgen.1011010), 2023-11-06
Supplement: pgen.1011010.s008.pdf [file pgen.1011010.s008.pdf]

DAPI GFAP mCherry Prox1a

1.5% 1,6-HD

2m

10m

30m

2m

10m

30m

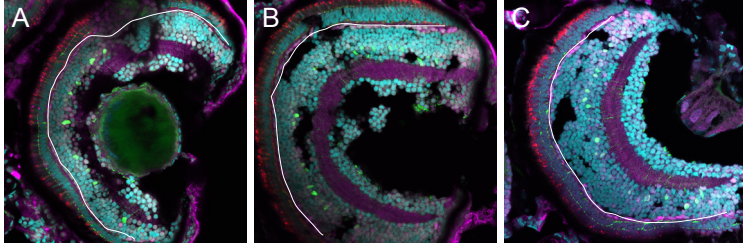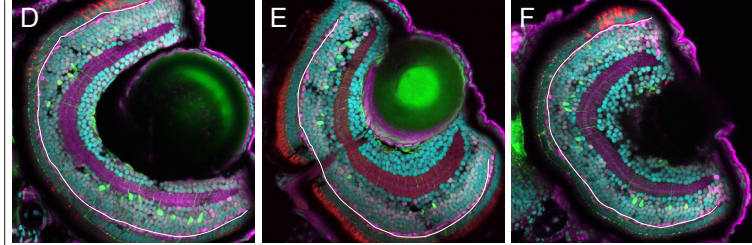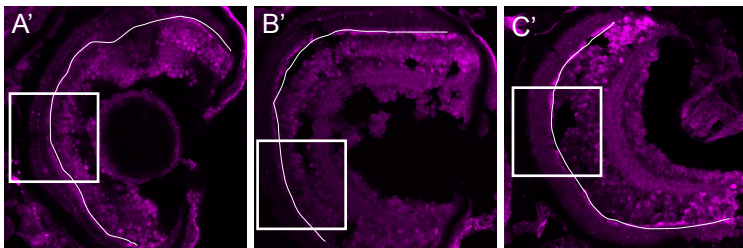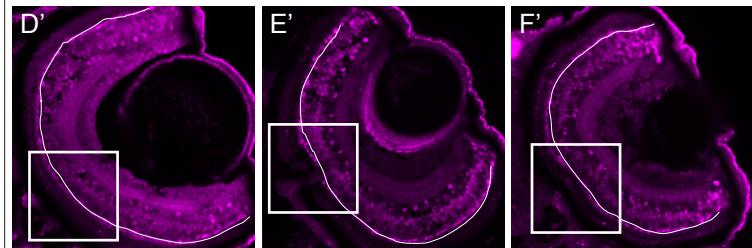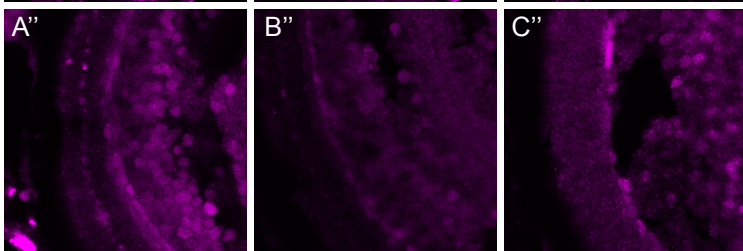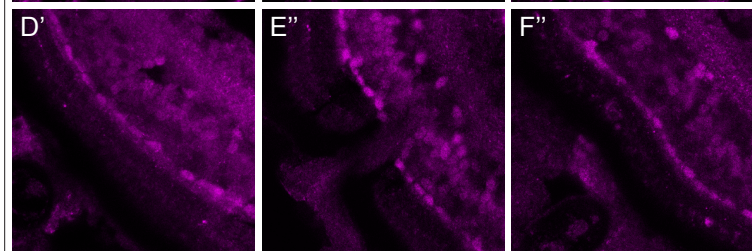

1.5% 2,5-HD

2m

10m

30m

2m

10m

30m

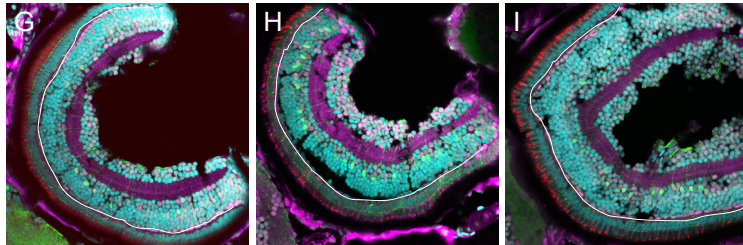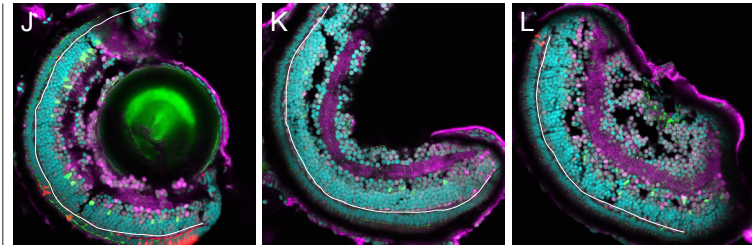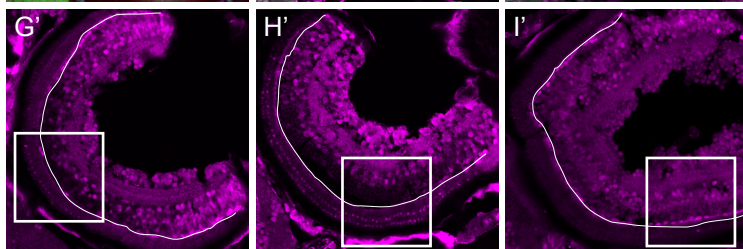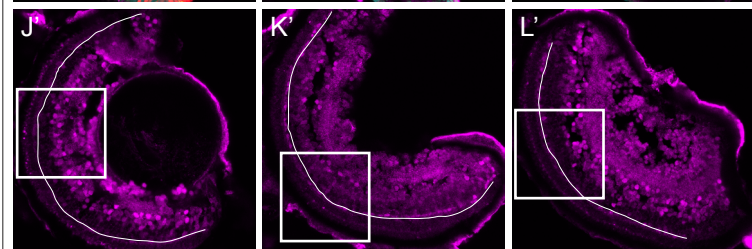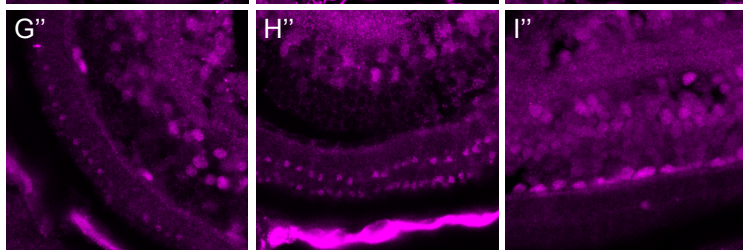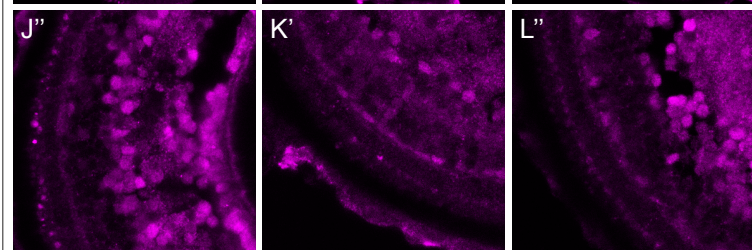

control

MTZ

control

MTZ
