# Supplementary material for: Her6 and Prox1a are novel regulators of photoreceptor regeneration in the zebrafish retina
Source: PubMed Central journal article supplement (PMC10653607; doi:10.1371/journal.pgen.1011010), 2023-11-06

DAPI GFAP mCherry Prox1a

5% 1,6-HD

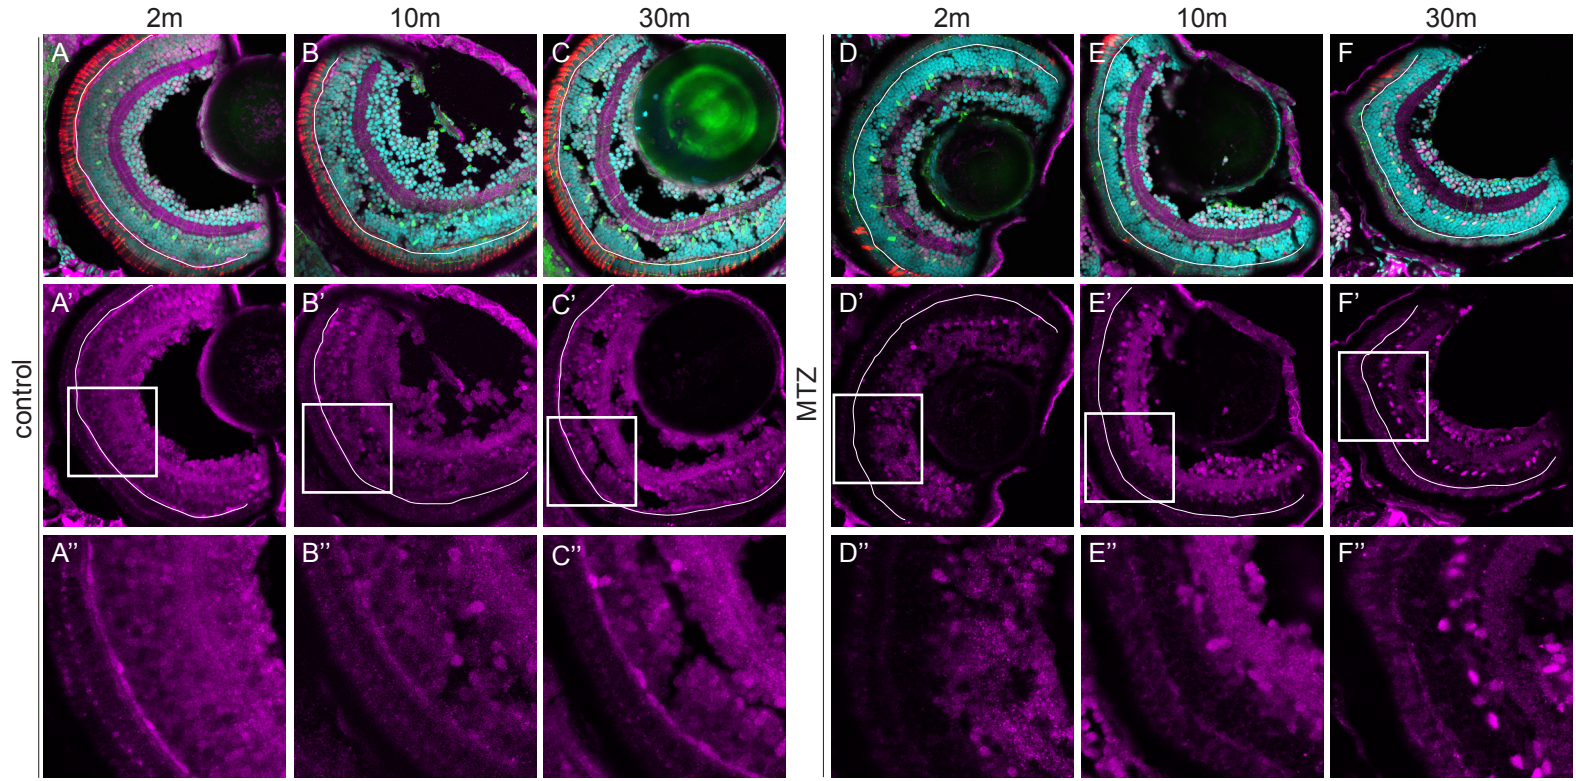

5% 2,5-HD

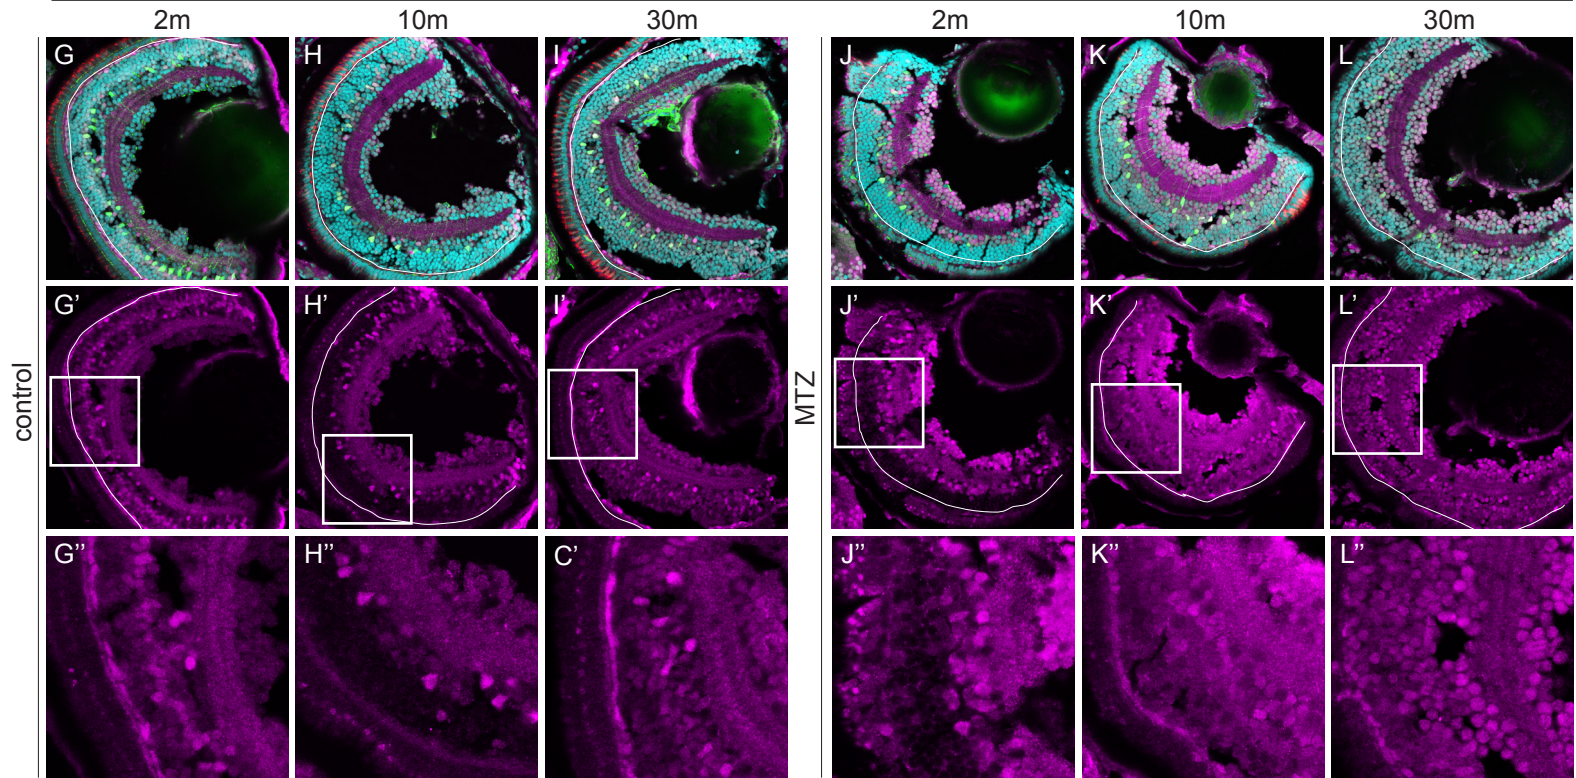

Supplement: pgen.1011010.s009.pdf [file pgen.1011010.s009.pdf]
