# Supplementary material for: Her6 and Prox1a are novel regulators of photoreceptor regeneration in the zebrafish retina
Source: PubMed Central journal article supplement (PMC10653607; doi:10.1371/journal.pgen.1011010), 2023-11-06

DAPI GFAP mCherry zpr1

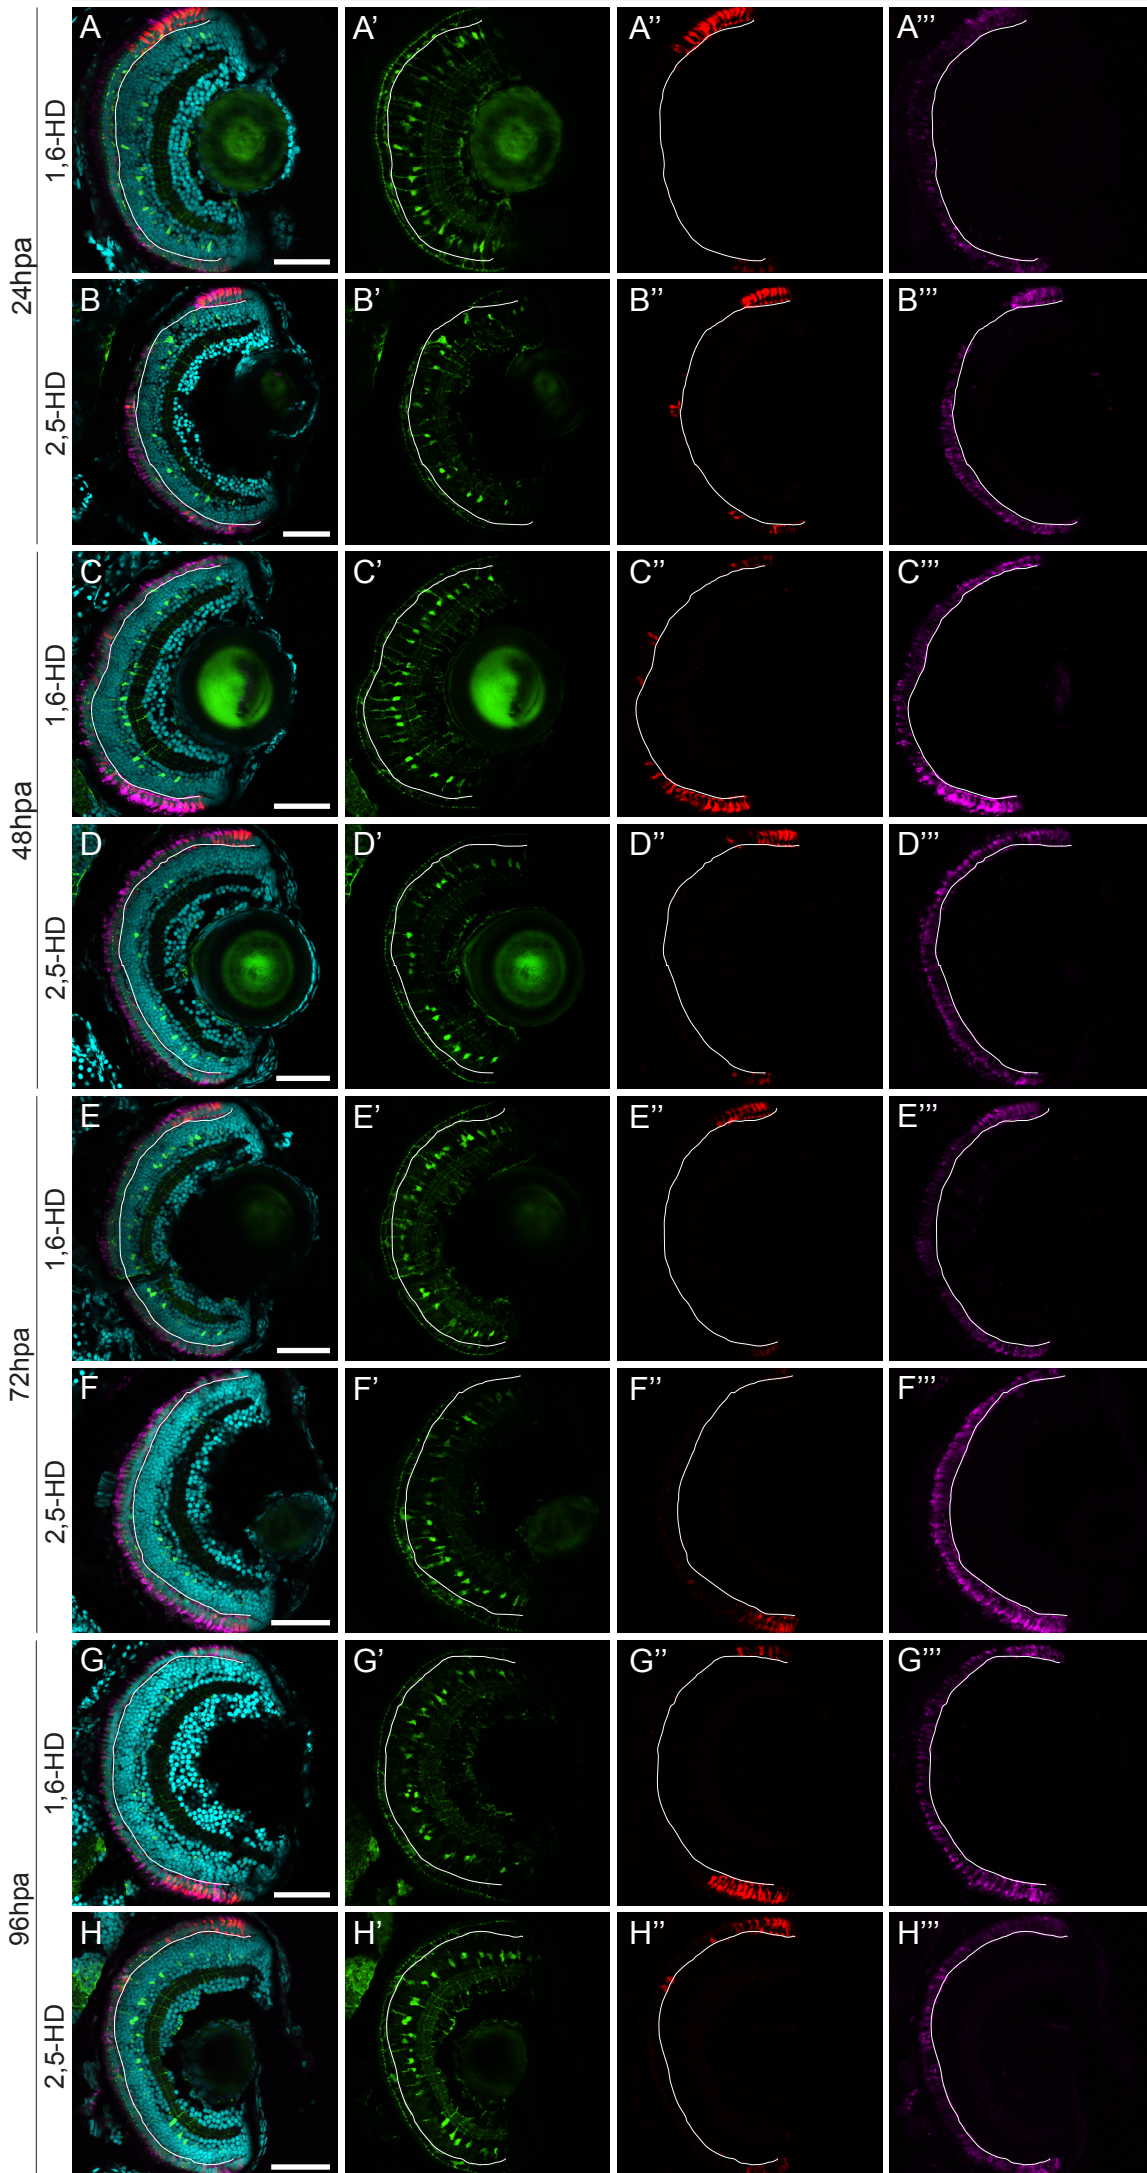

Supplement: pgen.1011010.s010.pdf [file pgen.1011010.s010.pdf]
